# Supplementary material
Source: PubMed Central journal article supplement (PMC7370805)
Supplement: NIHMS1574802-supplement-1.pdf [file NIHMS1574802-supplement-1.pdf]

## Supplementary Information

### Monobodies as enabling tools for structural and mechanistic biology

Oliver Hantschel,<sup>1,2\*</sup> Matthew Biancalana,<sup>3</sup> and Shohei Koide<sup>3,4\*</sup>

<sup>1</sup> Institute of Physiological Chemistry, Faculty of Medicine, Philipps-University of Marburg, Karl-von-Frisch-Straße 1, 35032 Marburg, Germany.

<sup>2</sup> Swiss Institute for Experimental Cancer Research (ISREC), School of Life Sciences, École polytechnique fédérale de Lausanne (EPFL), Station 19, 1015 Lausanne, Switzerland

<sup>3</sup> Laura and Isaac Perlmutter Cancer Center, New York University Langone Health, 522 1st Avenue, New York, NY 10016, USA

<sup>4</sup> Department of Medicine and Department of Biochemistry and Molecular Pharmacology, New York University School of Medicine, 522 1st Avenue, New York, NY 10016, USA

\* Corresponding authors: Oliver Hantschel (email: [oliver.hantschel@uni-marburg.de](mailto:oliver.hantschel@uni-marburg.de)) and Shohei Koide (email: [Shohei.Koide@nyumc.org](mailto:Shohei.Koide@nyumc.org))

Supplementary Figure 1. Observed packing modes of monobodies.

Supplementary Figure 2. Observed interactions between monobody symmetry mates.

Supplementary Table 1. Monobody-target structures available in the Protein Data Bank at the time of this article. (separate Excel file)

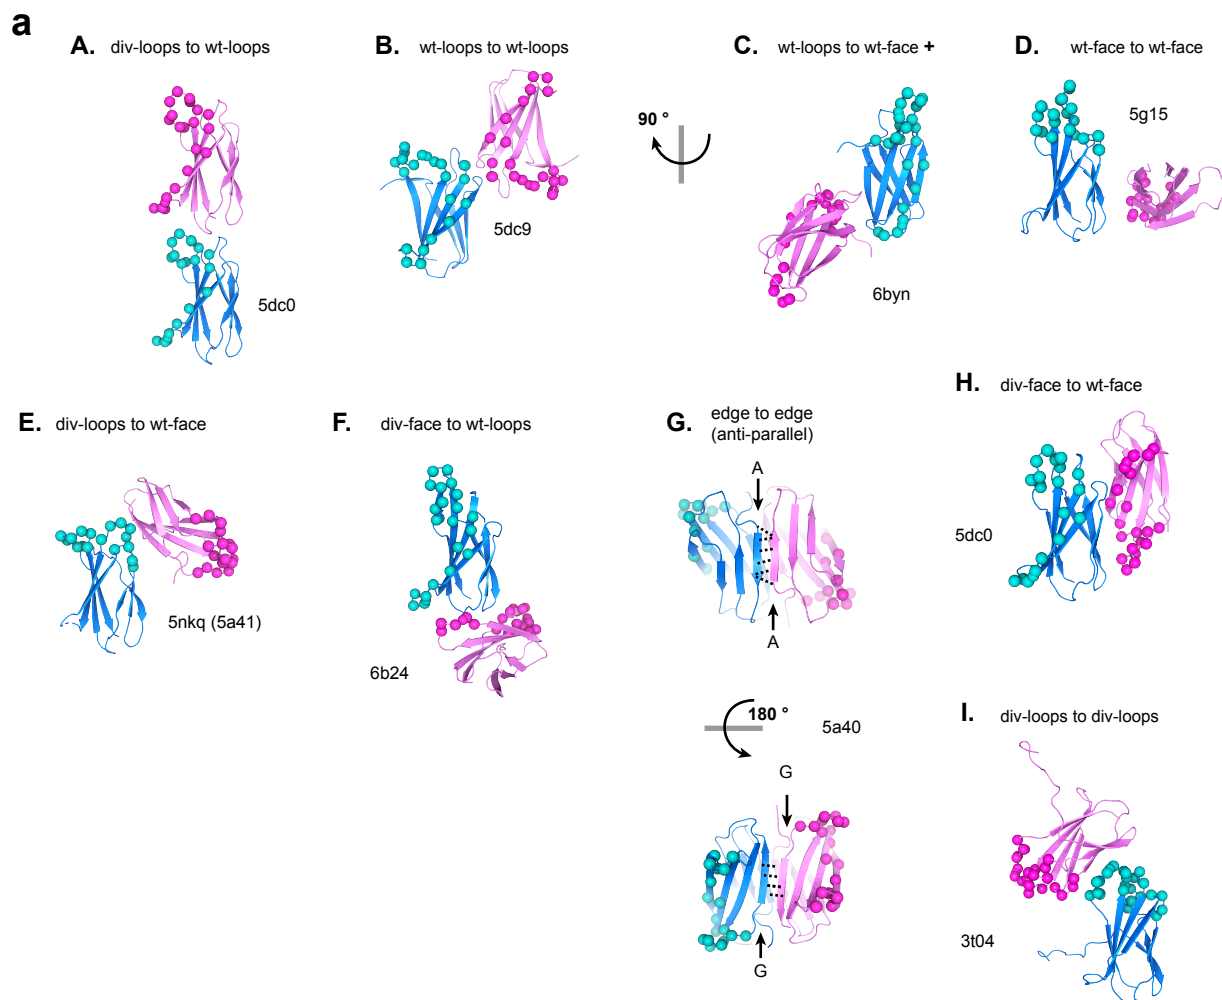

**b**

| Mode | Interaction                            | # Observed | Structures (PDB codes)                                                             |
|------|----------------------------------------|------------|------------------------------------------------------------------------------------|
| A    | diversified-loops to wt-loops          | 14         | 6bqo, 6bqo, 6byn, 5mtj, 5dc0, 5dc0, 5dc9, 5dc9, 4huk, 4je4, 4je4, 3rzw, 3qht, 3k2m |
| B    | wt-loops to wt-loops                   | 12         | 6bx4, 6byn, 5mtj, 5oc7, 5oc7, 5oc7, 5dc0, 5dc9, 5nkq (5a41), 4je4, 4je4, 3uyo      |
| C    | wt-loops to wt-face                    | 10         | 6bqo, 6bqo, 6byn, 5oc7, 5oc7, 5ecj, 4huk, 4jeg, 4jeg, 3k2m                         |
| D    | wt-face to wt-face                     | 10         | 6bqo, 6bqo, 6bx5, 6byn, 5mtj, 5a40, 5ecj, 4huk, 3k2m                               |
| E    | diversified-loops to wt-face           | 7          | 6byn, 5dc0, 5nkq (5a41), 5nkq (5a41), 4jeg, 4jeg, 3t04                             |
| F    | diversified-face to wt-loops           | 5          | 6bx4, 6bx4, 6bx5, 6b24, 6b24                                                       |
| G    | edge to edge (anti-parallel)           | 3          | 5a40, 5a40, 3k2m                                                                   |
| H    | diversified-face to wt-face            | 2          | 6bx4, 5dc0                                                                         |
| I    | diversified-loops to diversified-loops | 1          | 3t04                                                                               |
| J    | edge to edge (parallel)                | 0          |                                                                                    |
| K    | diversified-loops to diversified-face  | 0          |                                                                                    |
| L    | diversified-face to diversified-face   | 0          |                                                                                    |

**Supplementary Fig. 1. Observed packing modes of monobodies**

(a) Cartoon representations of modes of two-body interactions between monobody molecules, classified according to regions of monobody that are involved in crystal contacts.

(b) Summary table of observed monobody-monombody crystal packing interactions, using the criteria as described for Supplementary Table 1.

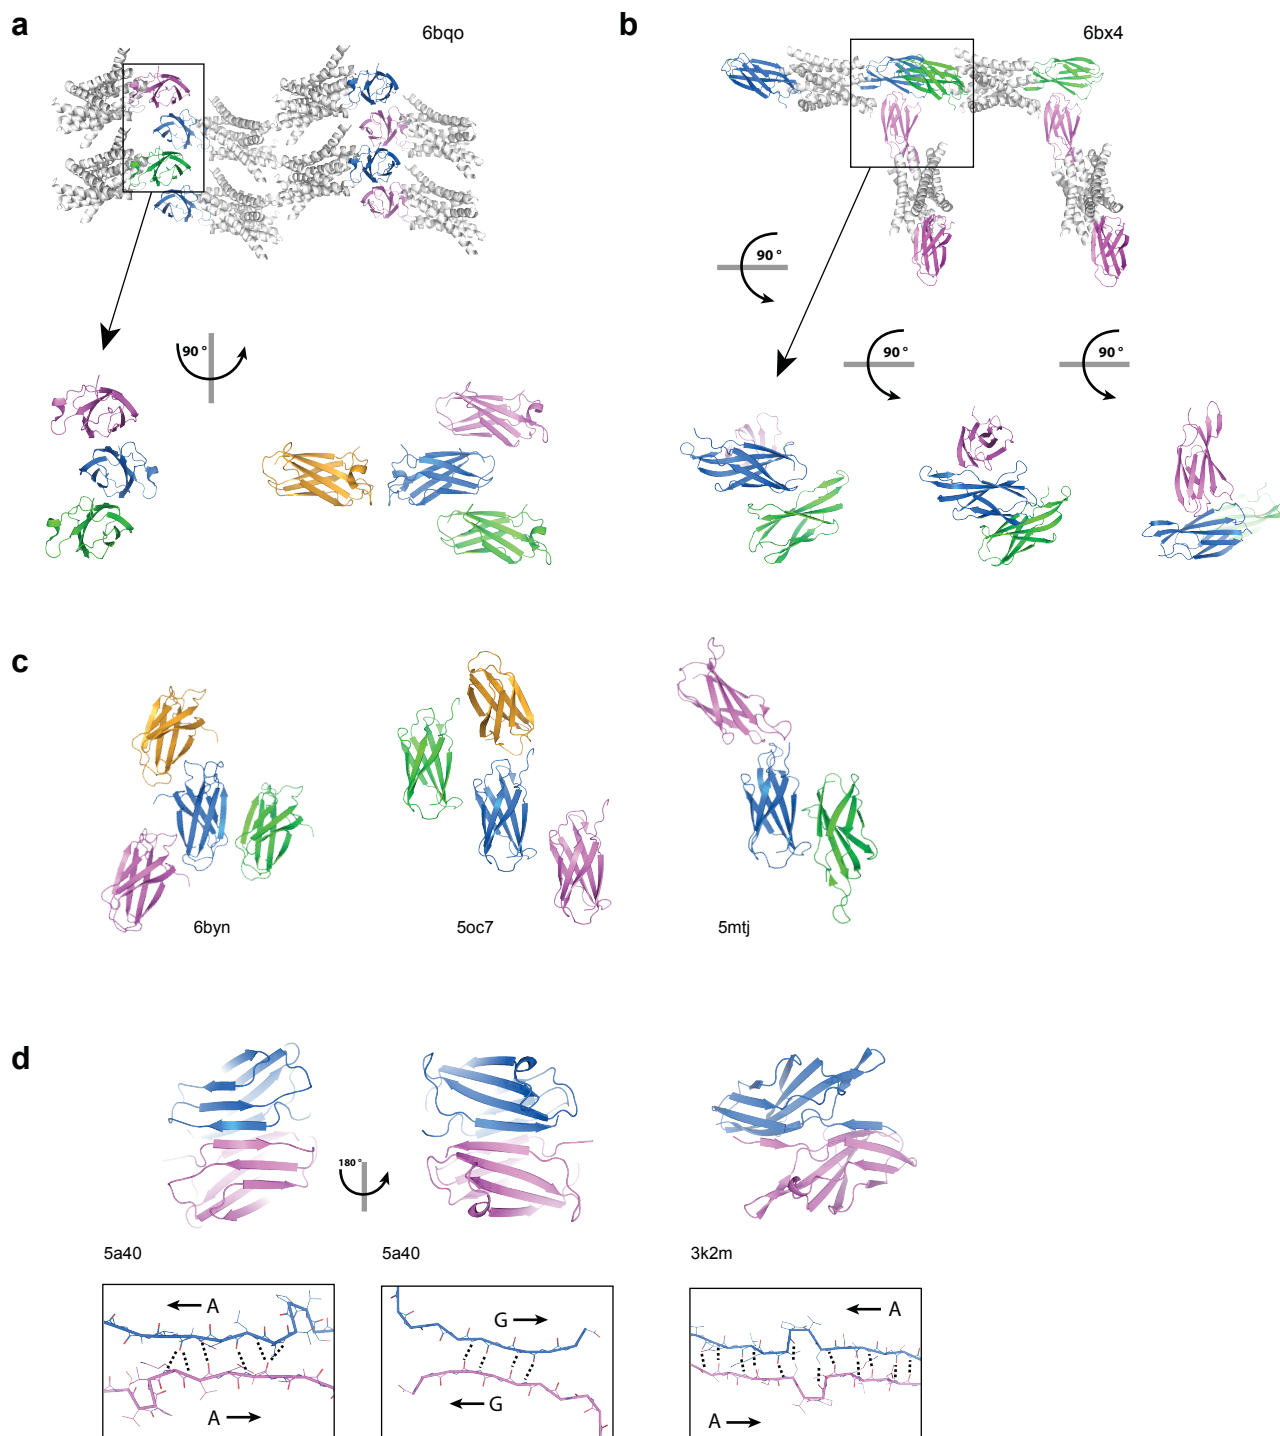

**Supplementary Fig. 2. Observed interactions between monobody symmetry mates**

(a-c) Representative crystal structures containing crystal contacts involving more than two monobody molecules. All structures as shown as cartoons.

(d) Hydrogen bonding observed between edge strands of monobodies. All structures are shown both as cartoons and as backbone models with hydrogen-bonds depicted as dotted lines.
